# Supplementary material for: Subsurface Flow Phytoremediation Using Barley Plants for Water Recovery from Kerosene-Contaminated Water: Effect of Kerosene Concentration and Removal Kinetics
Source: MDPI journal article supplement (doi:10.3390/w14050687), 2022-02-22
Supplement: s1 [file s1]

Archive with 1 entries (1 files):
- water-1550361-supplementary.pdf
