# Supplementary material for: Subsurface Flow Phytoremediation Using Barley Plants for Water Recovery from Kerosene-Contaminated Water: Effect of Kerosene Concentration and Removal Kinetics
Source: MDPI journal article supplement (doi:10.3390/w14050687), 2022-02-22

## **Subsurface Flow Phytoremediation Using Barley Plants for Water Recovery from Kerosene-Contaminated Water: Effect of Kerosene Concentration and Removal Kinetics**

**Mohanad J. M-Ridha<sup>1</sup>, Muna Faeq Ali <sup>1</sup>, Ahmed Hussein Taly <sup>2</sup>, Khalid M. Abed <sup>3,4</sup>, Sabah J. Mohammed <sup>1</sup>, Mohd Hafizuddin Muhamad <sup>5,6</sup> and Hassimi Abu Hasan <sup>5,6,\*</sup>**

<sup>1</sup>Environmental Engineering Department, College of Engineering, University of Baghdad, Baghdad 10071, Iraq; muhannadenviro@coeng.uobaghdad.edu.iq (M.J.M.-R.); munafaiq@coeng.uobaghdad (M.F.A.); eng.sabah1212@gmail.com (S.J.M.)

<sup>2</sup>College of Agriculture, University of Baghdad, Baghdad 10071, Iraq; ahmed\_gili@yahoo.com

<sup>3</sup>Chemical Engineering Department, College of Engineering, University of Baghdad, Baghdad 10071, Iraq; khalid.chemical82@gmail.com

<sup>4</sup>Department of Chemical Engineering, Faculty of Engineering, University of Malaya, Kuala Lumpur 50603, Selangor, Malaysia

<sup>5</sup>Department of Chemical and Process Engineering, Faculty of Engineering and Built Environment, Universiti Kebangsaan Malaysia, 43600 Bangi, Selangor, Malaysia; ir\_din84@yahoo.com.my

<sup>6</sup>Research Centre for Sustainable Process Technology (CESPRO), Faculty of Engineering and Built Environment, Universiti Kebangsaan Malaysia, 43600 Bangi, Selangor, Malaysia

\* Correspondence: [hassimi@ukm.edu.my](mailto:hassimi@ukm.edu.my), Tel. +60-38921-6402

**Figure S1** Percentage of withered Barley in relation to kerosene concentrations

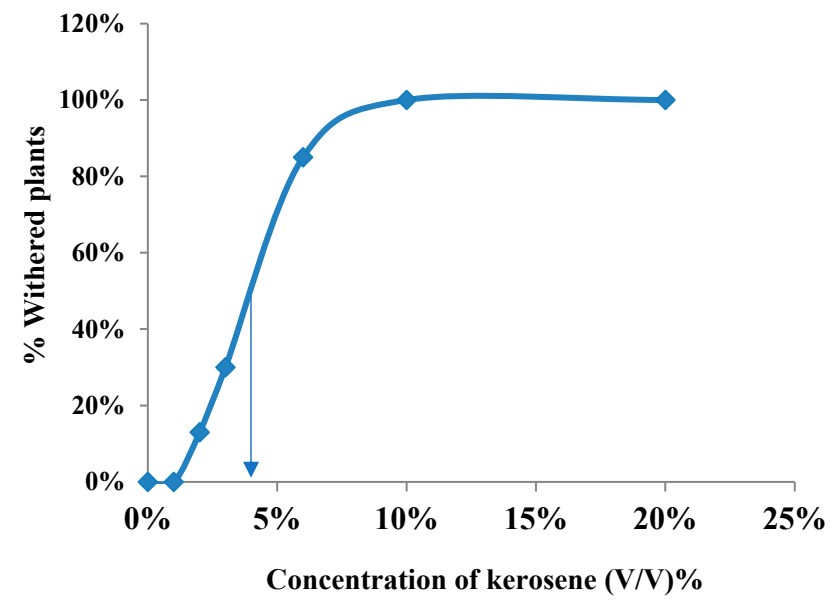

**Figure S2** GC chromatograms at different concentration of kerosene

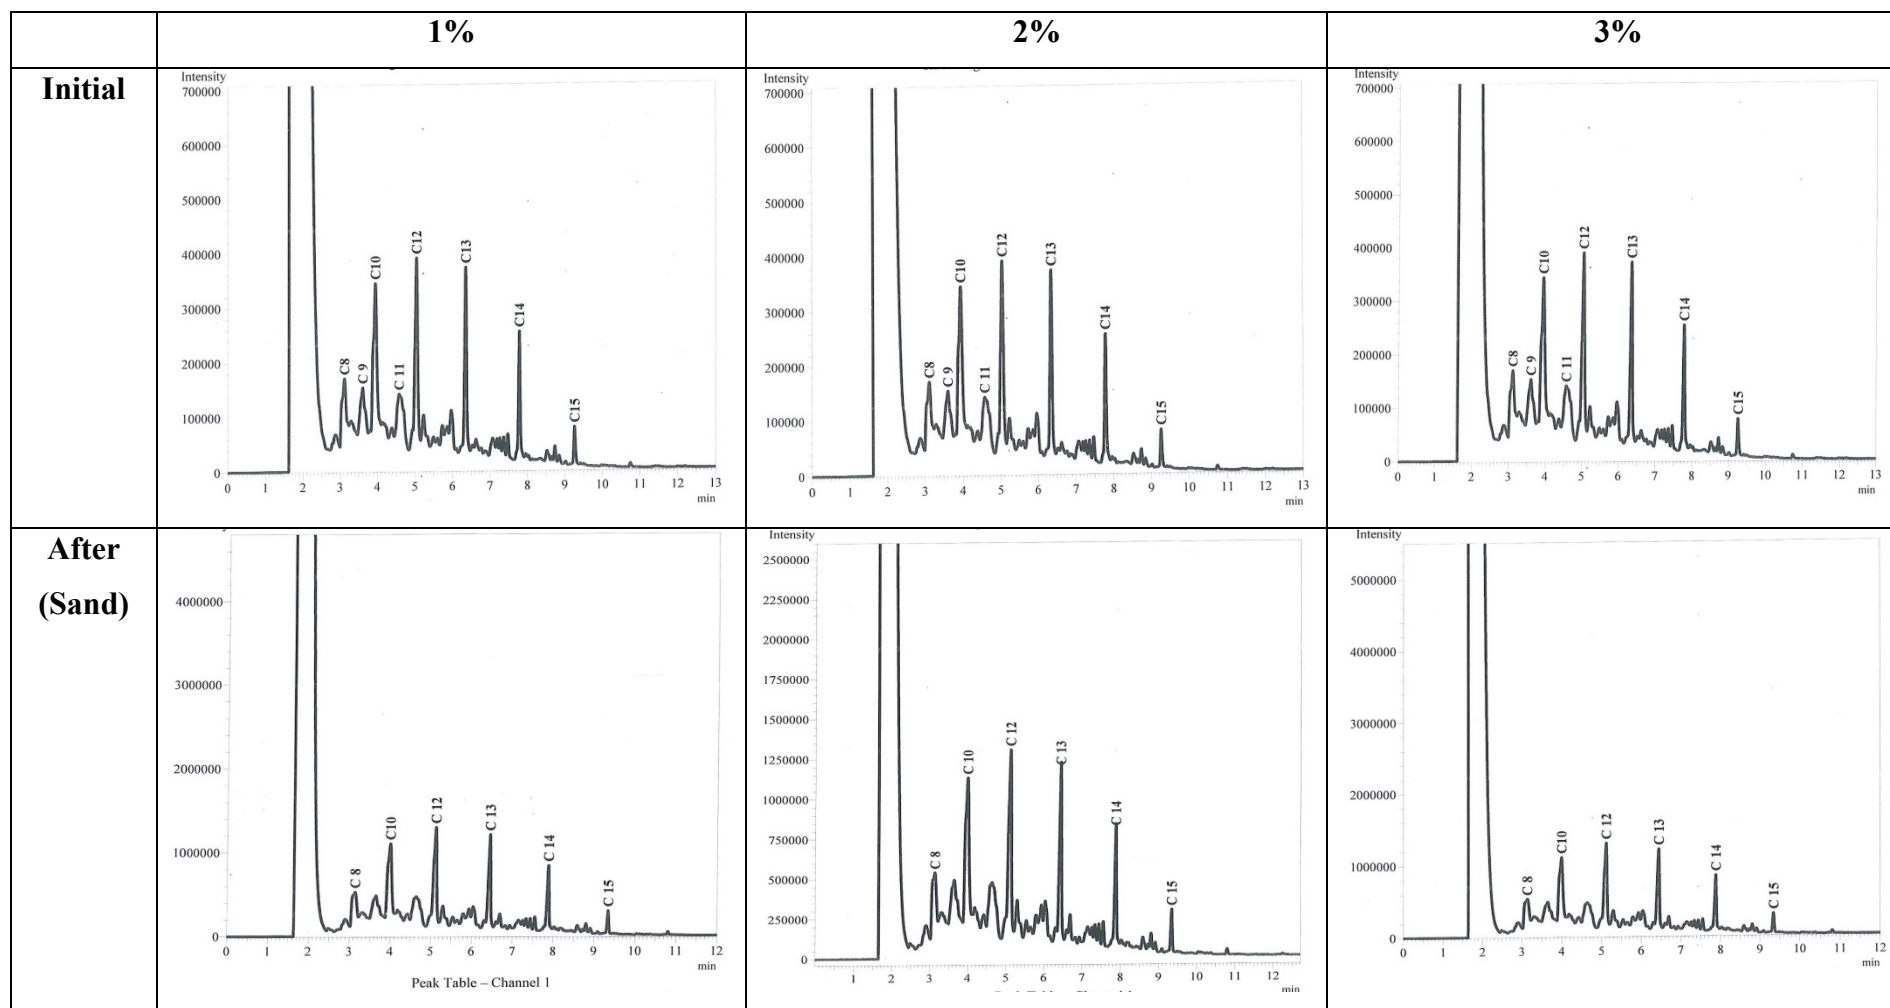

**After  
(Plant)**

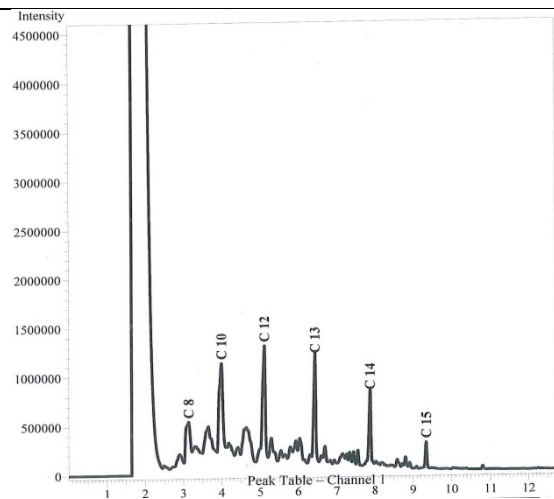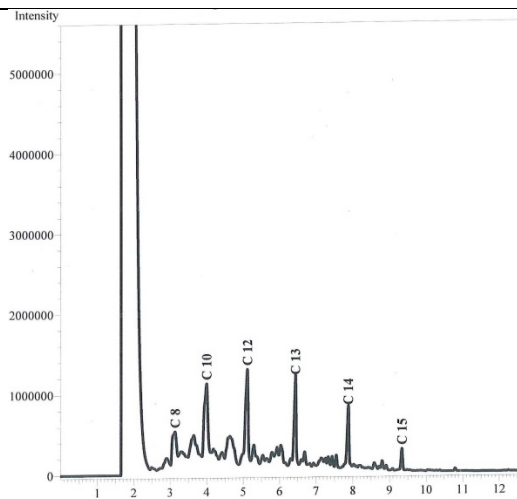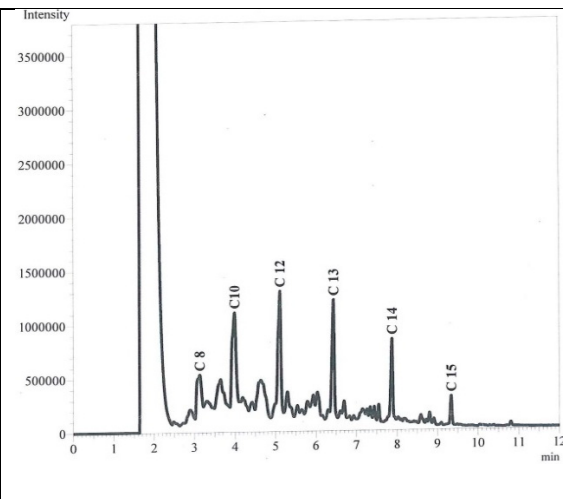

Supplement: s1 [file s1 › water-1550361-supplementary.pdf]
